# Supplementary material for: Trends in Osteopathic Authorship in Orthopedic Publications and Its Impact on Adult Reconstruction Match Rates
Source: PubMed Central journal article supplement — Arthroplast Today. 2023 Nov 23;24:101276. doi: 10.1016/j.artd.2023.101276 (PMC10701118; doi:10.1016/j.artd.2023.101276), 2023-11-23
Supplement: mmc1.pdf [file mmc1.pdf]

# INDIVIDUAL CONFLICT OF INTEREST STATEMENT

## *American Association of Hip and Knee Surgeons*

(Adopted from the American Academy of Orthopaedic Surgeons disclosure statement)

The following form **must be filled out completely and submitted by each author (example, 6 authors, 6 forms).**  
**All items require a response. If there is no relevant disclosure for a given item, enter "None."**

Trends In Osteopathic Authorship in Orthopaedic Publications and Its Impact On Adult Reconstruction Match Rates

1. Royalties from a company or supplier (The following conflicts were disclosed)  
**None**
2. Speakers bureau/paid presentations for a company or supplier (The following conflicts were disclosed)  
**none**
- 3A. Paid employee for a company or supplier (The following conflicts were disclosed)  
**none**
- 3B. Paid consultant for a company or supplier (The following conflicts were disclosed)  
**none**
- 3C. Unpaid consultants for a company or supplier (The following conflicts were disclosed)  
**none**
4. Stock or stock options in a company or supplier (The following conflicts were disclosed)  
**none**
5. Research support from a company or supplier as a Principal Investigator (The following conflicts were disclosed)  
**none**
6. Other financial or material support from a company or supplier (The following conflicts were disclosed)  
**none**
7. Royalties, financial or material support from publishers (The following conflicts were disclosed)  
**none**
8. Medical/Orthopaedic publications editorial/governing board (The following conflicts were disclosed)  
**Editorial Board-Journal of Arthroplasty**
9. Board member/committee appointments for a society (The following conflicts were disclosed)  
**none**

**Each author must sign AND print or type his/her name, date and submit a separate form**

In addition, one BLINDED Conflict of Interest form (no author names used) should be submitted per manuscript with all author disclosures.

Eddie S. Wu

Author Name (Print or Type)



Author Signature

1/5/2023

Date
